# Supplementary material for: Spirodiazaselenuranes: synthesis, structure and antioxidant activity
Source: Royal Society of Chemistry journal article supplement (doi:10.1039/c2ob26156a), 2012-01-01
Supplement: c2ob26156a.pdf [file c2ob26156a.pdf]

Supporting Information  
for

## Spirodiazaselenuranes: Synthesis, Structure and Antioxidant Activity

Devappa S. Lamani, Debasish Bhowmick and Govindasamy Mugesh\*

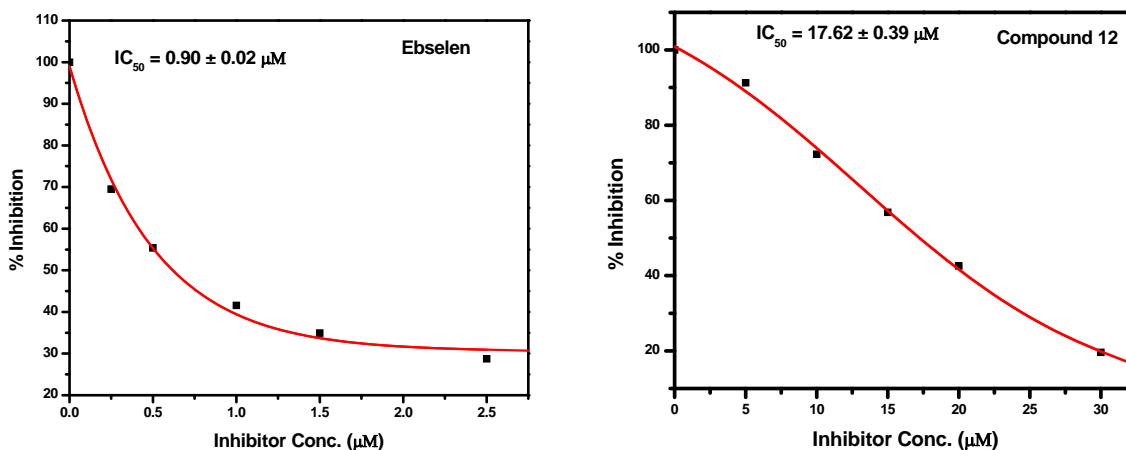

Figure-S1. Plot of inhibition of PN-mediated oxidation of DHR by **ebselen** and compound **12**.

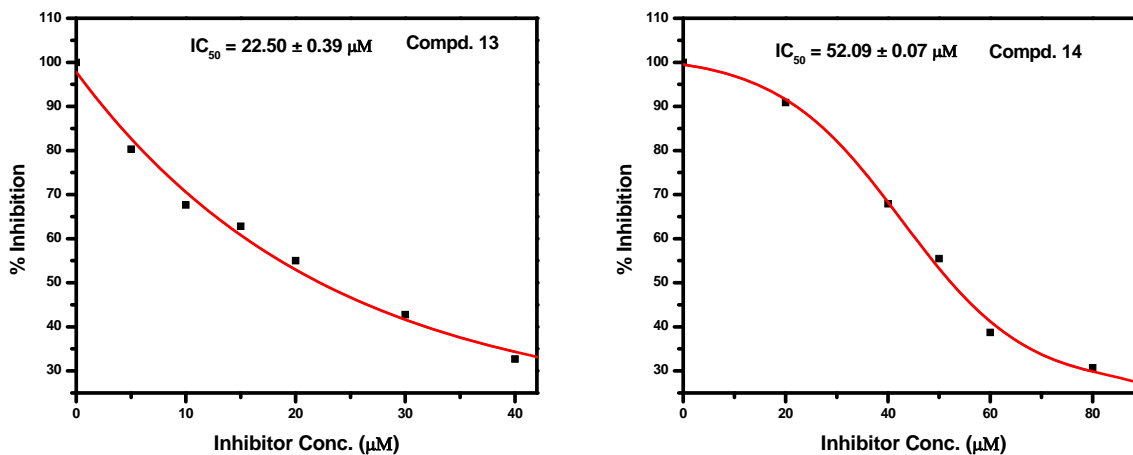

Figure-S2. Plot of inhibition of PN-mediated oxidation of DHR by compound **13** and compound **14**.

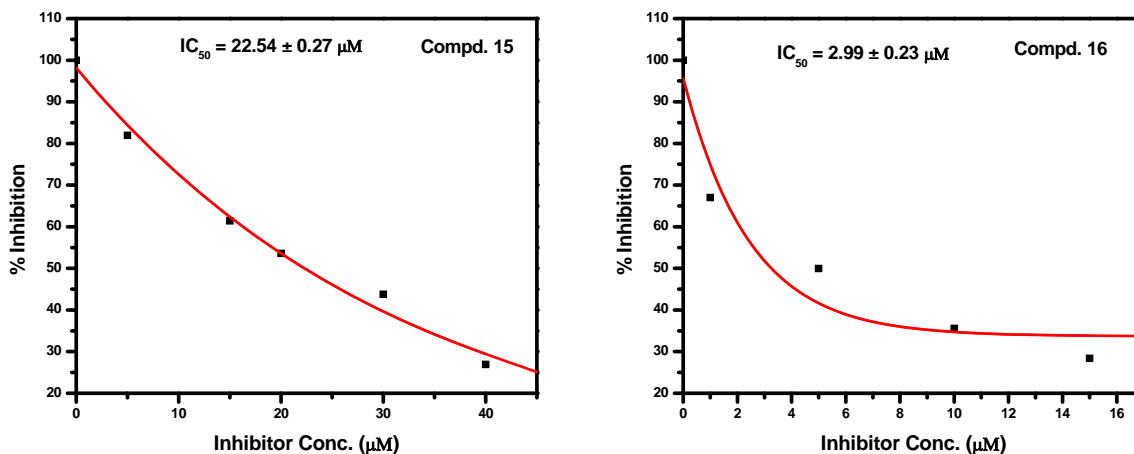

Figure-S3. Plot of inhibition of PN-mediated oxidation of DHR by compound 15 and compound 16.

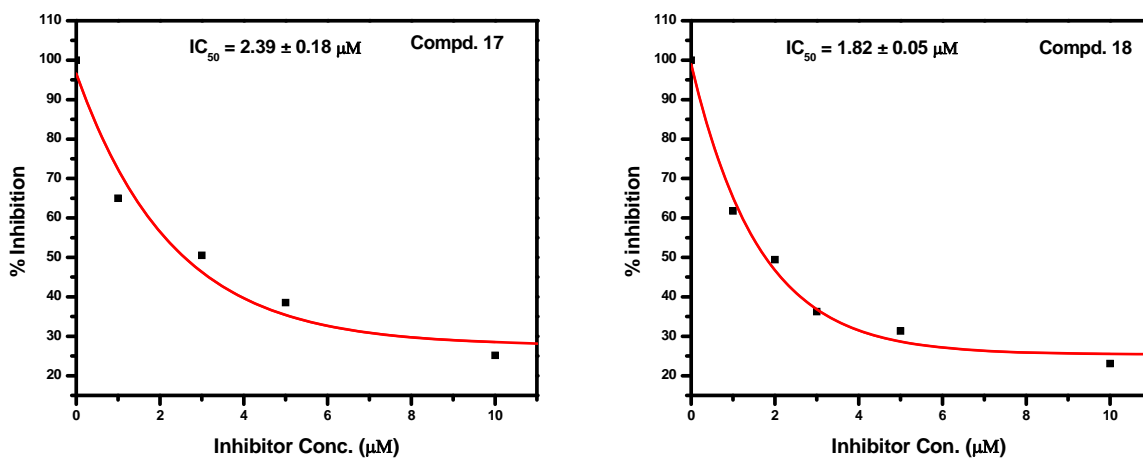

Figure-S4. Plot of inhibition of PN-mediated oxidation of DHR by compound 17 and compound 18.

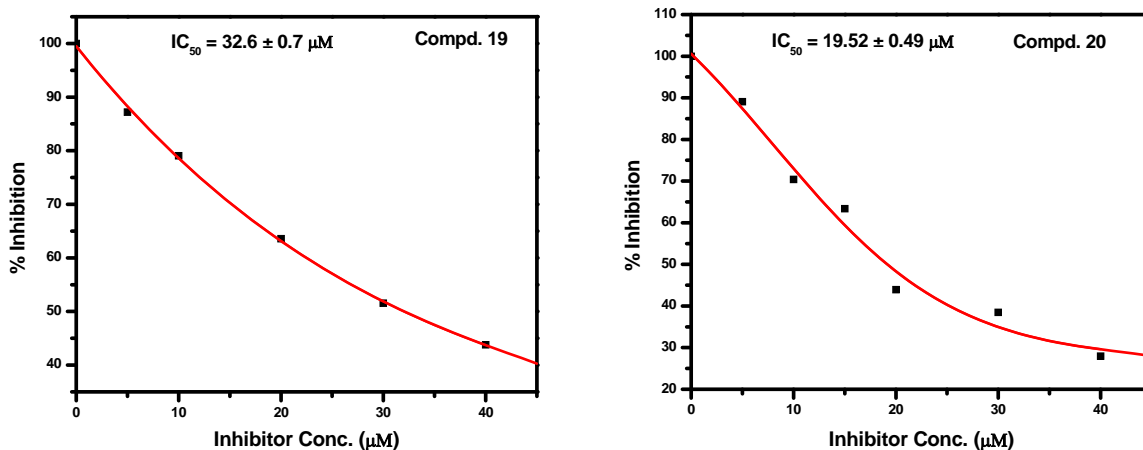

Figure-S5. Plot of inhibition of PN-mediated oxidation of DHR by compound **19** and compound **20**.

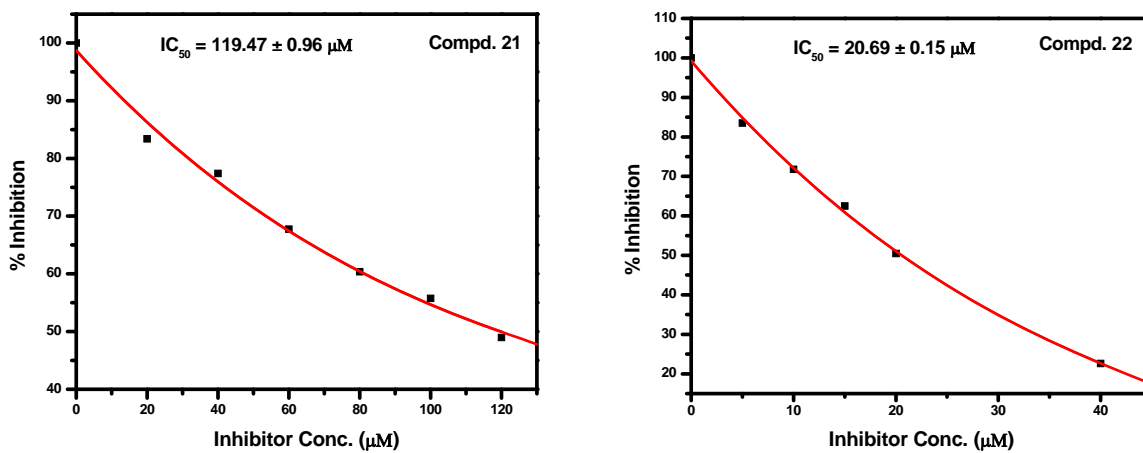

Figure-S6. Plot of inhibition of PN-mediated oxidation of DHR by compound **21** and compound **22**.

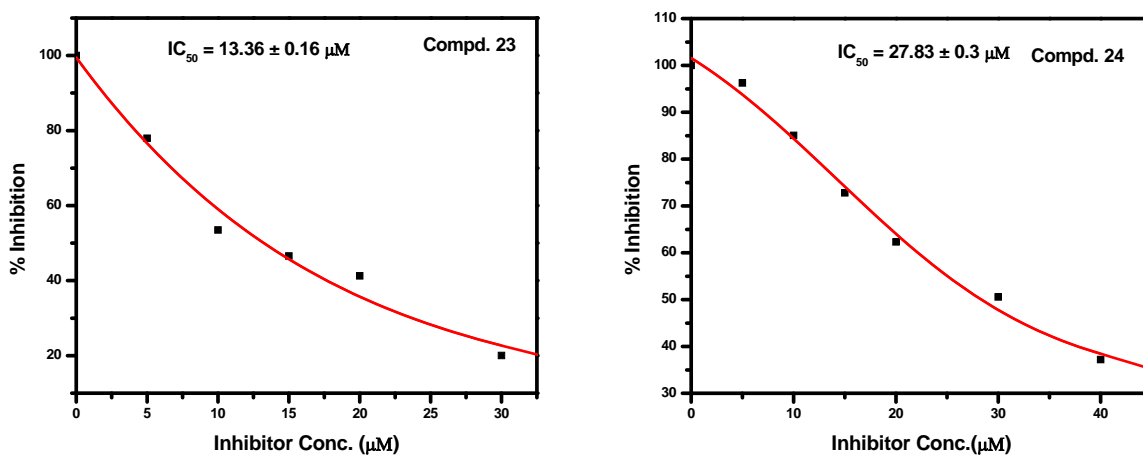

Figure-S7. Plot of inhibition of PN-mediated oxidation of DHR by compound **23** and compound **24**.

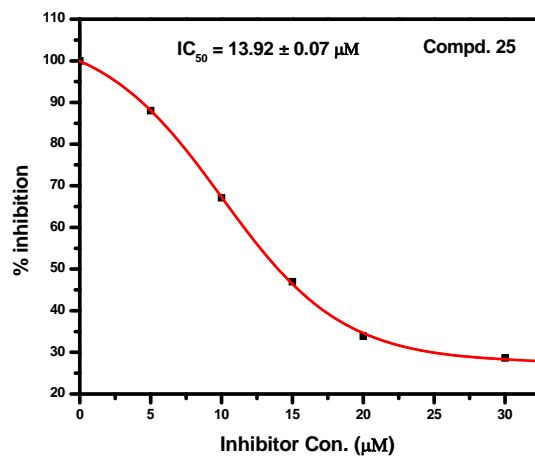

Figure-S8. Plot of inhibition of PN-mediated oxidation of DHR by compound **25**.

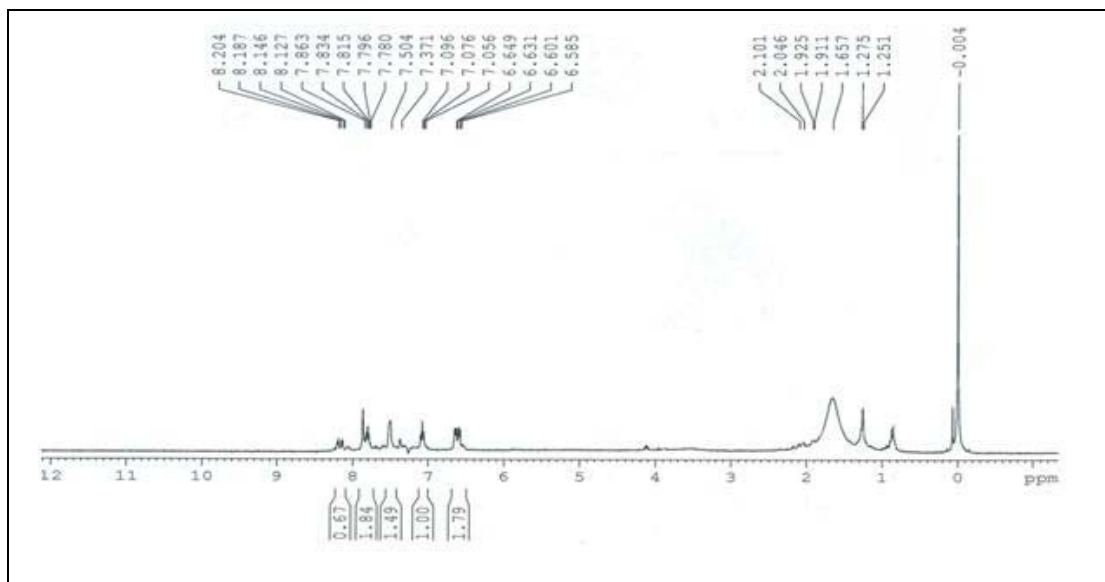

Figure-S9.  $^1\text{H}$  NMR spectra of pure spirodiazoselenurane **19** in  $\text{CD}_3\text{OD}$ .

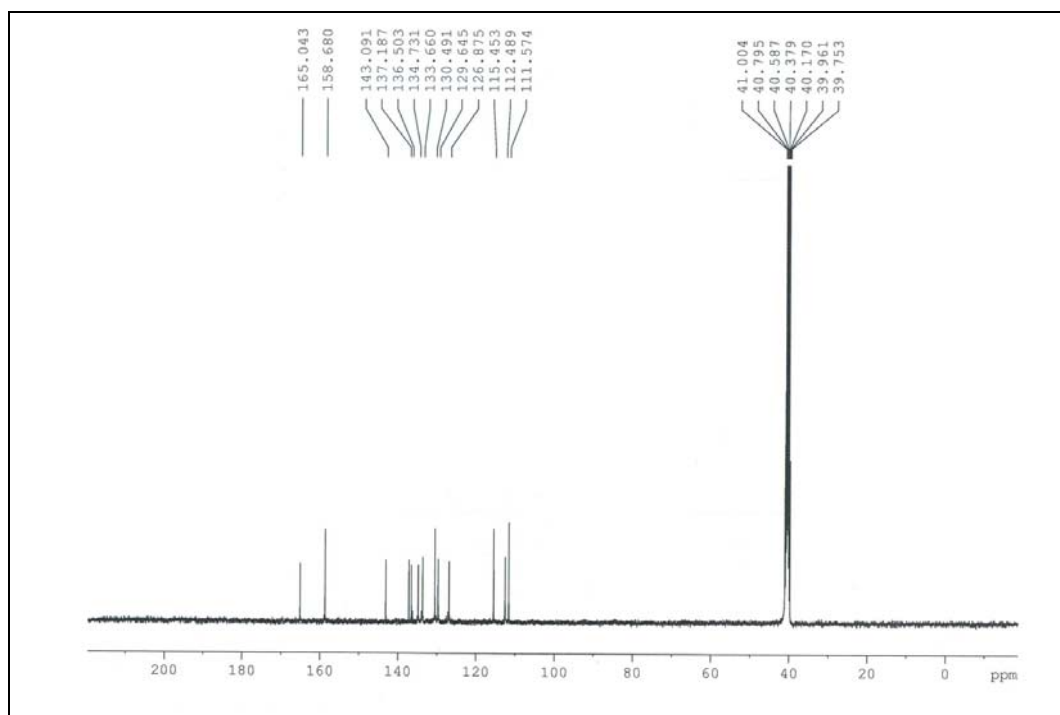

Figure-S10.  $^{13}\text{C}$  NMR spectra of pure spirodiazoselenurane **19** in  $\text{DMSO-d}_6$ .

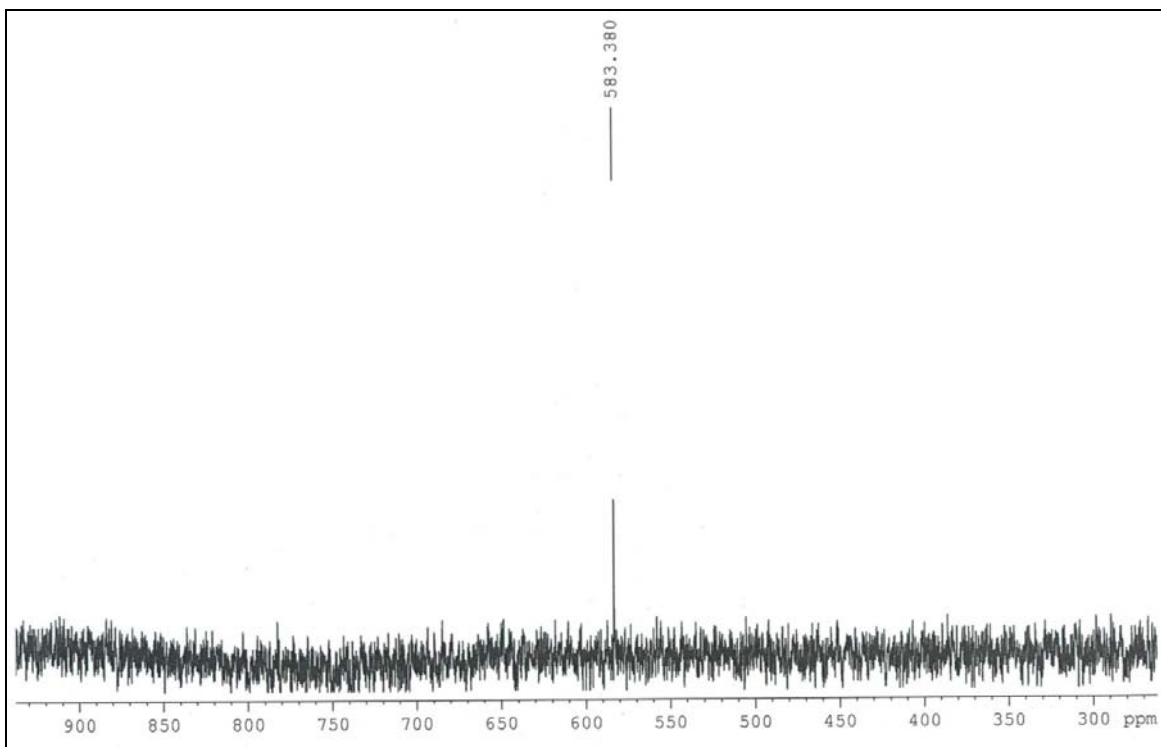

Figure-S11.  $^{77}\text{Se}$  NMR spectra of pure spirodiazoselenurane **19** in  $\text{DMSO-d}_6$ .

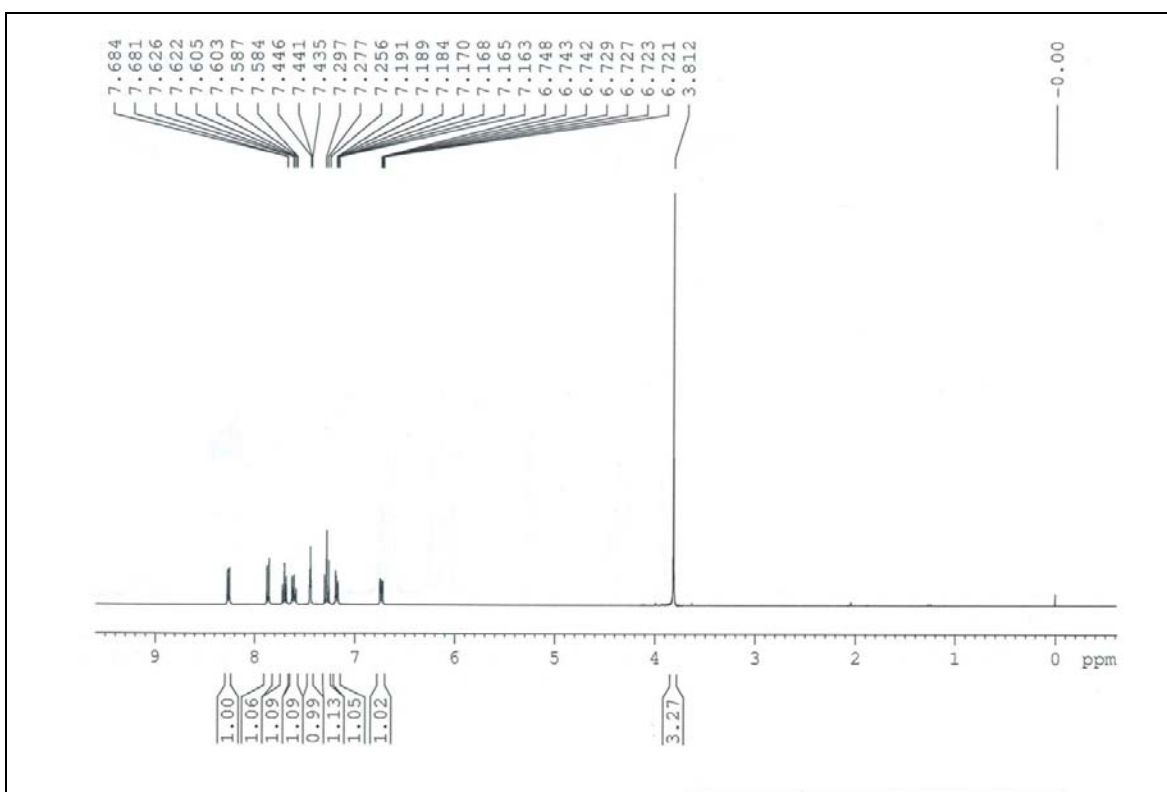

Figure-S12.  $^1\text{H}$  NMR spectra of pure spirodiazoselenurane **20** in  $\text{CDCl}_3$ .

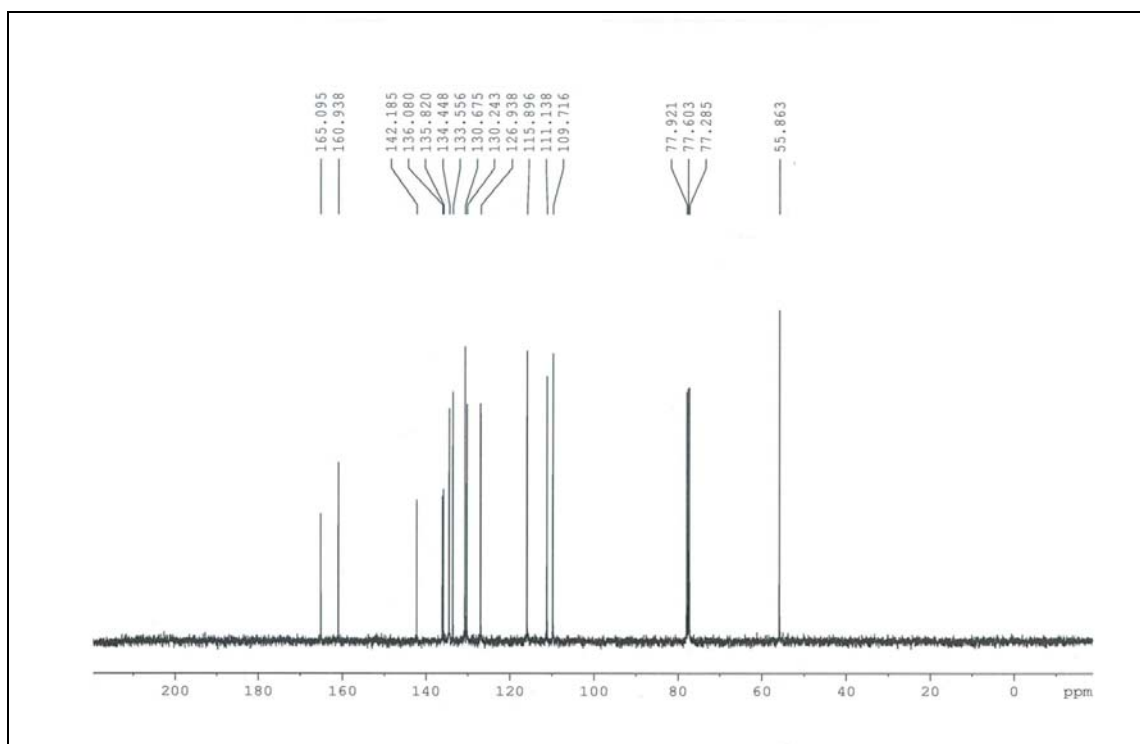

Figure-S13.  $^{13}\text{C}$  NMR spectra of pure spirodiazoselenurane **20** in  $\text{CDCl}_3$ .

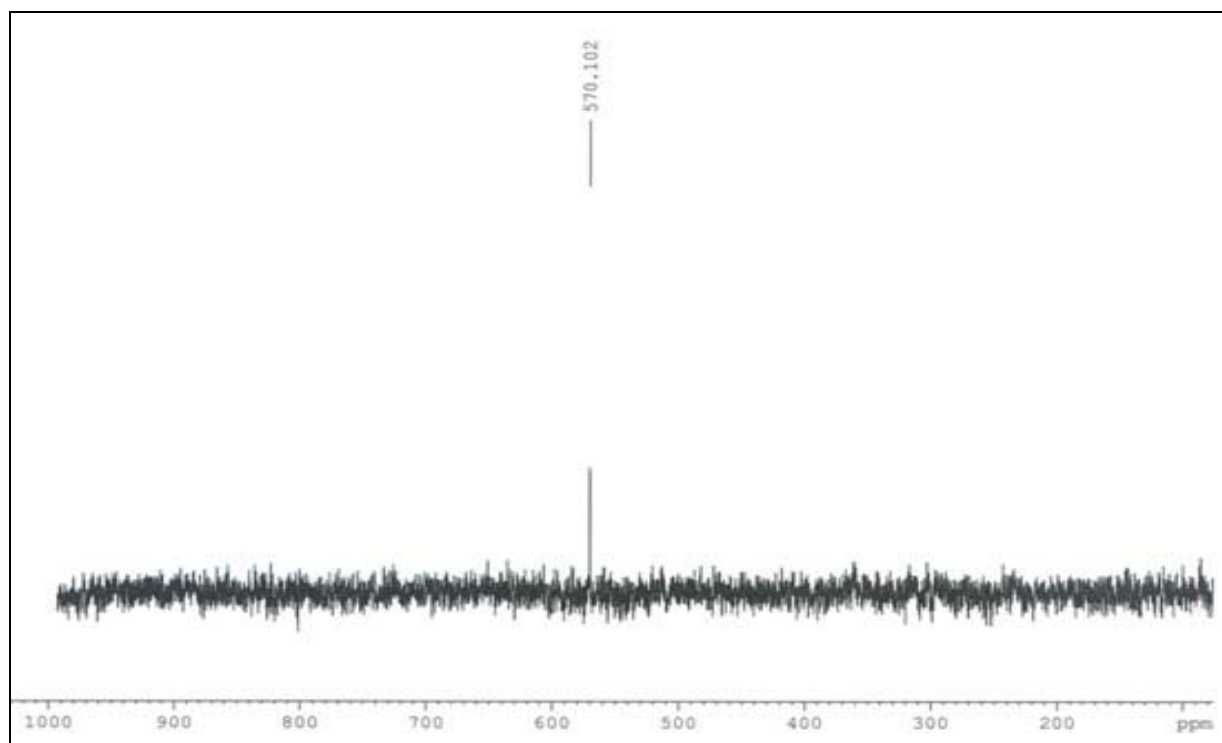

Figure-S14.  $^{77}\text{Se}$  NMR spectra of pure spirodiazoselenurane **20** in  $\text{CDCl}_3$ .

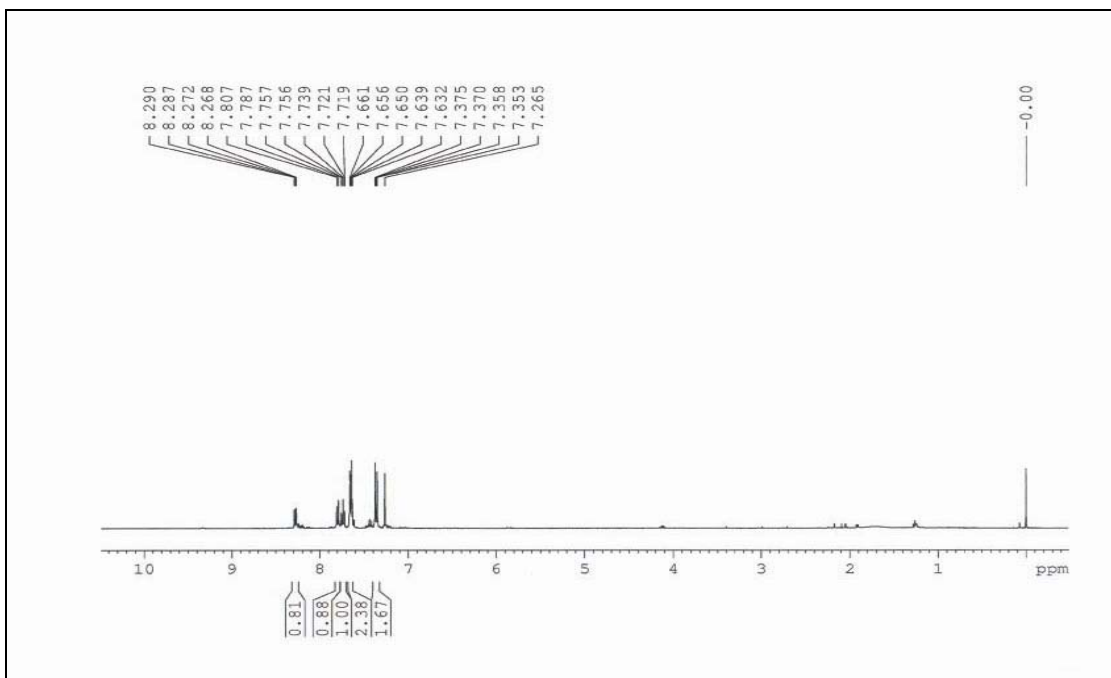

Figure-S15. <sup>1</sup>H NMR spectra of pure spirodiazoselenurane **21** in CDCl<sub>3</sub>.

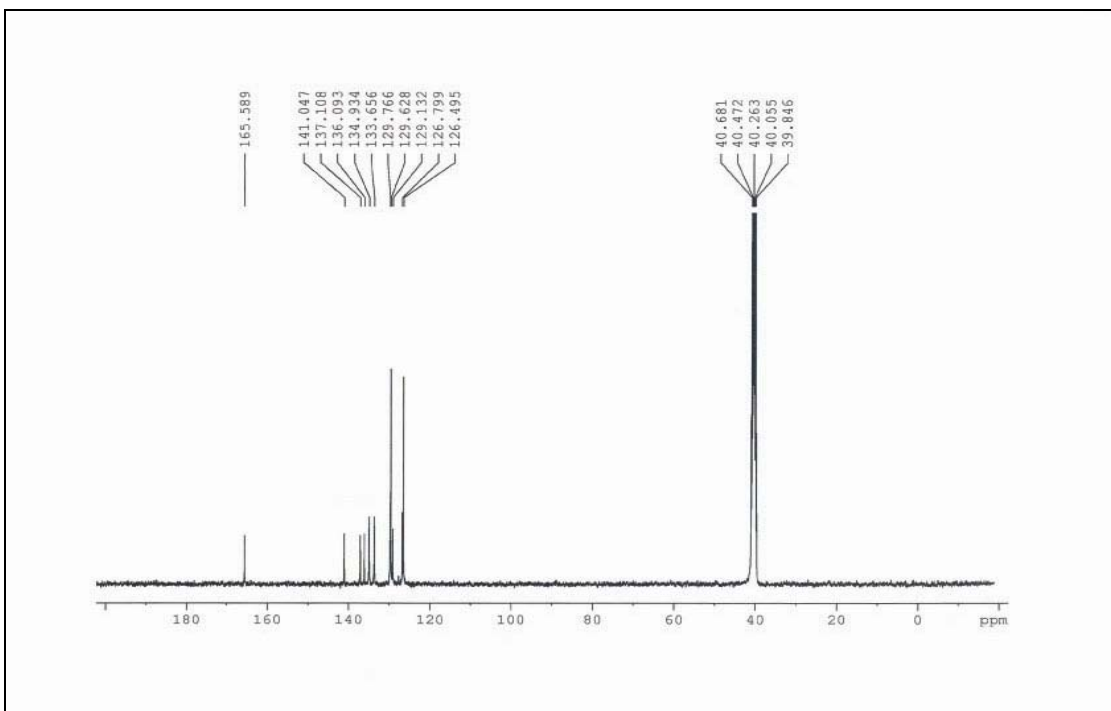

Figure-S16. <sup>13</sup>C NMR spectra of pure spirodiazoselenurane **21** in DMSO-d<sub>6</sub>.



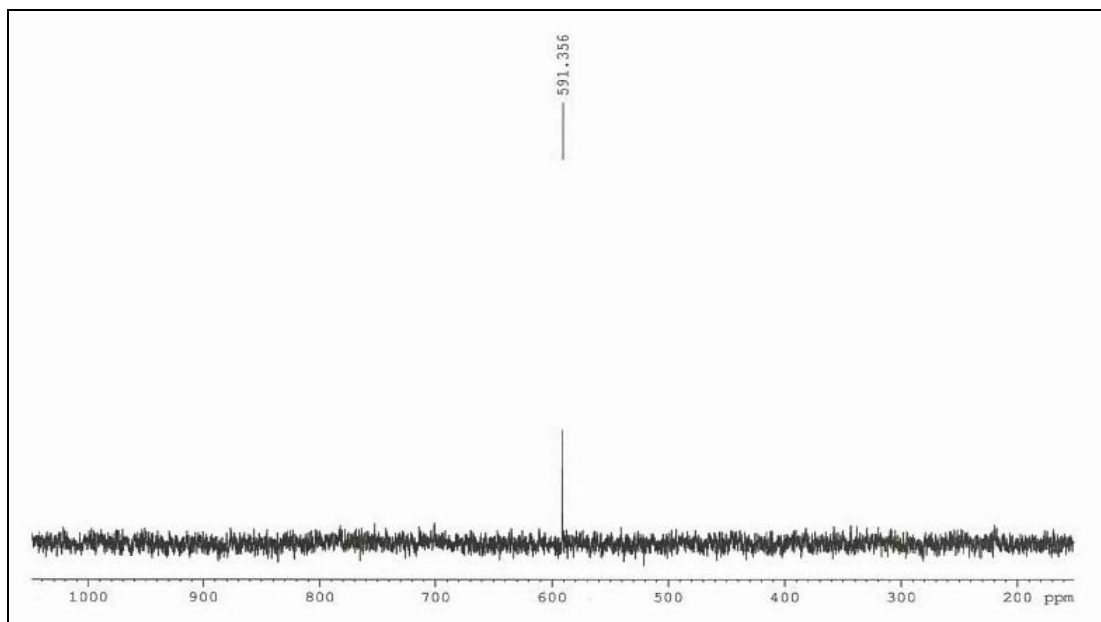

Figure-S17.  $^{77}\text{Se}$  NMR spectra of pure spirodiazoselenurane **21** in  $\text{DMSO-d}_6$ .

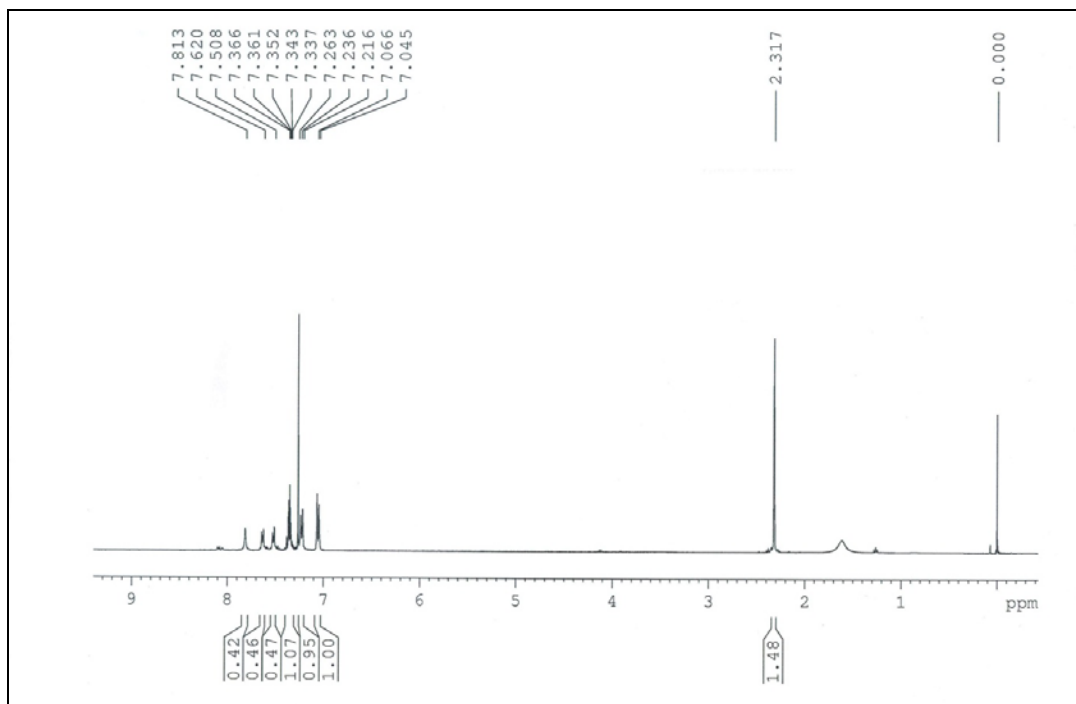

Figure-S18.  $^1\text{H}$  NMR spectra of pure spirodiazoselenurane **23** in  $\text{CDCl}_3$ .

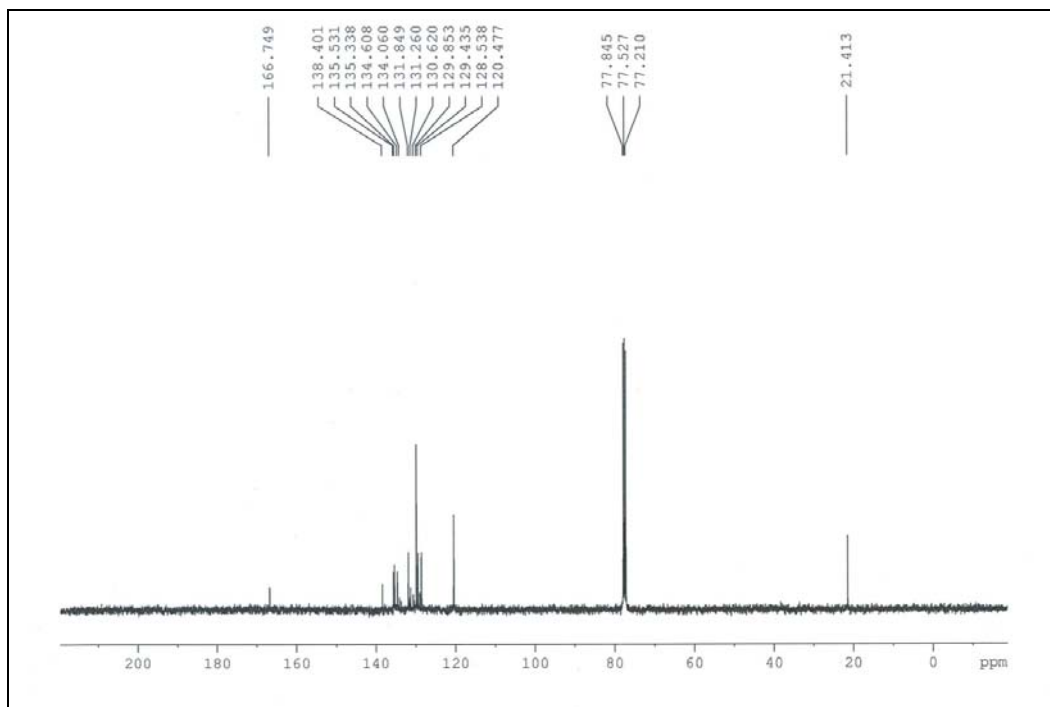

Figure-S19.  $^{13}\text{C}$  NMR spectra of pure spirodiazoselenurane **23** in  $\text{CDCl}_3$ .

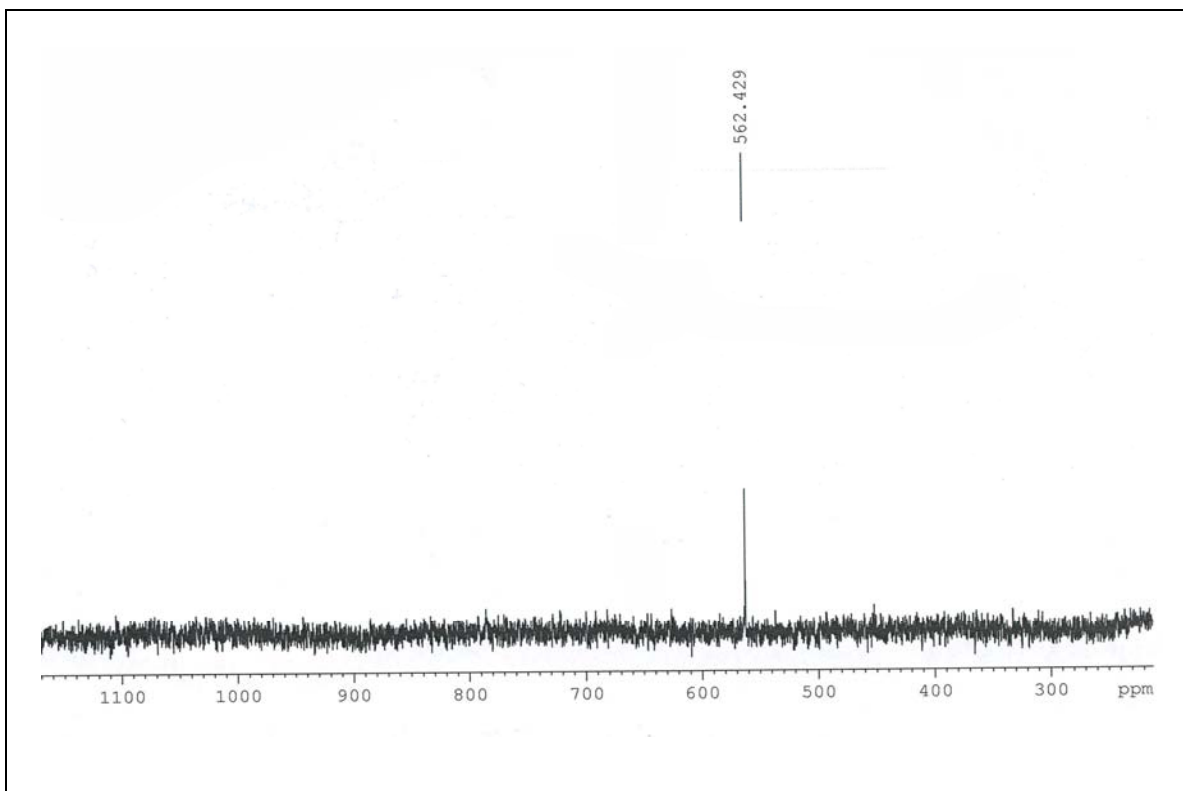

Figure-S20.  $^{77}\text{Se}$  NMR spectra of pure spirodiazoselenurane **23** in  $\text{DMSO-d}_6$ .

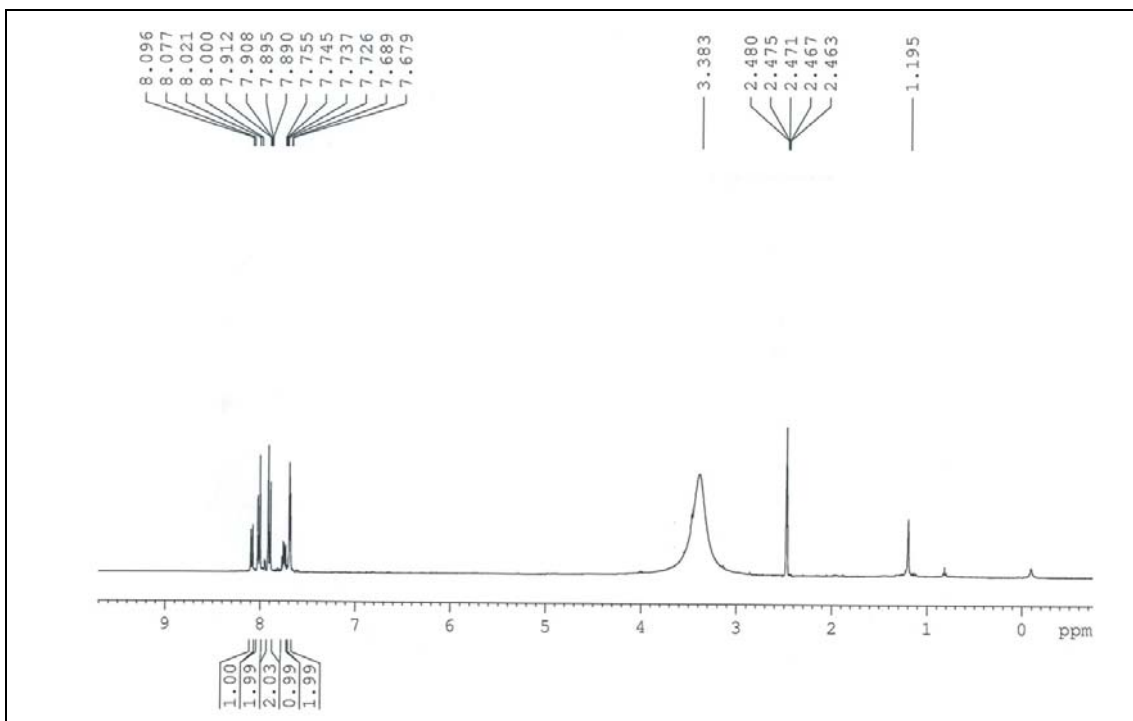

Figure-S21. <sup>1</sup>H NMR spectra of pure spirodiazoselenurane **24** in DMSO-d<sub>6</sub>.

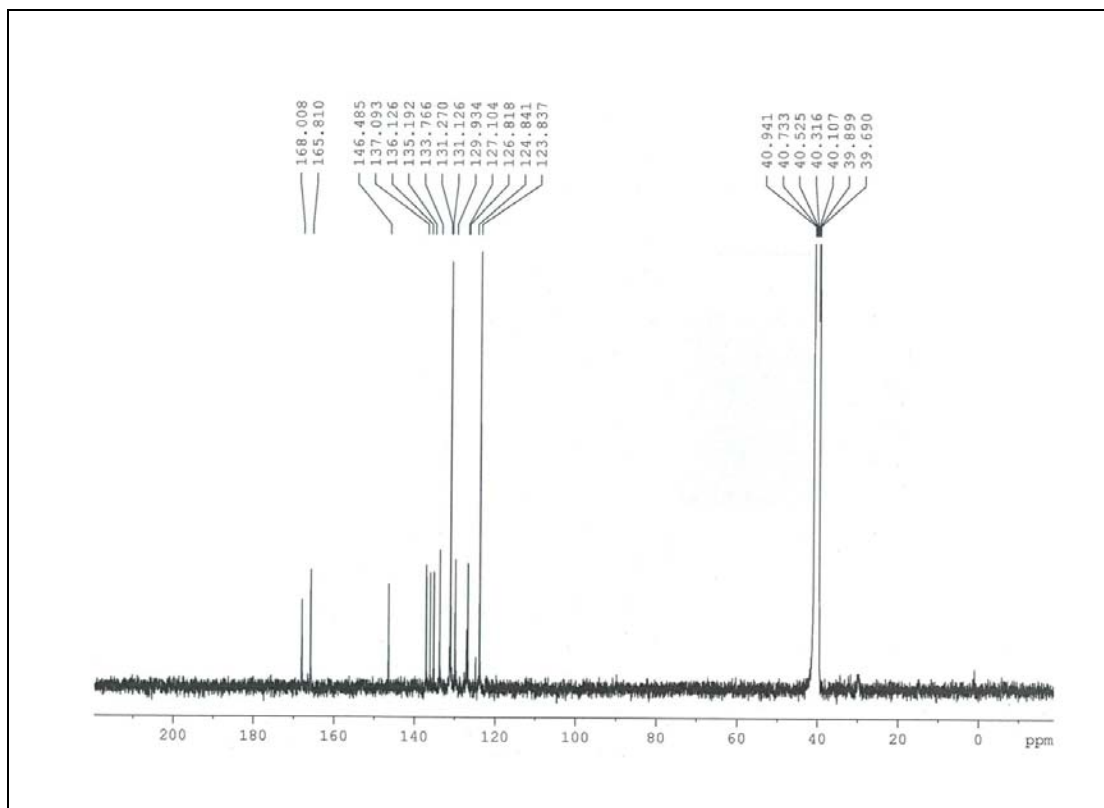

Figure-S22. <sup>13</sup>C NMR spectra of pure spirodiazoselenurane **24** in DMSO-d<sub>6</sub>.

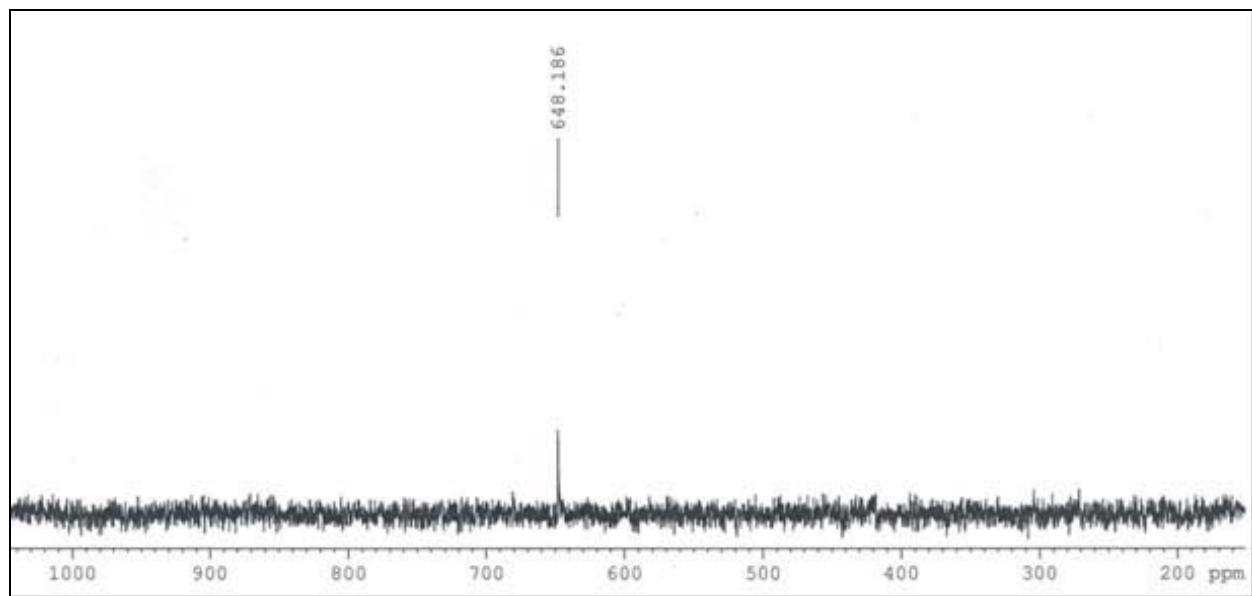

Figure-S23.  $^{77}\text{Se}$  NMR spectra of pure spirodiazoselenurane **24** in  $\text{DMSO-d}_6$ .

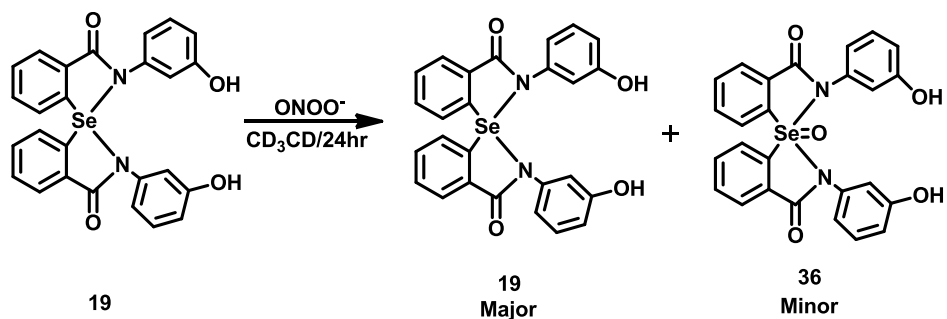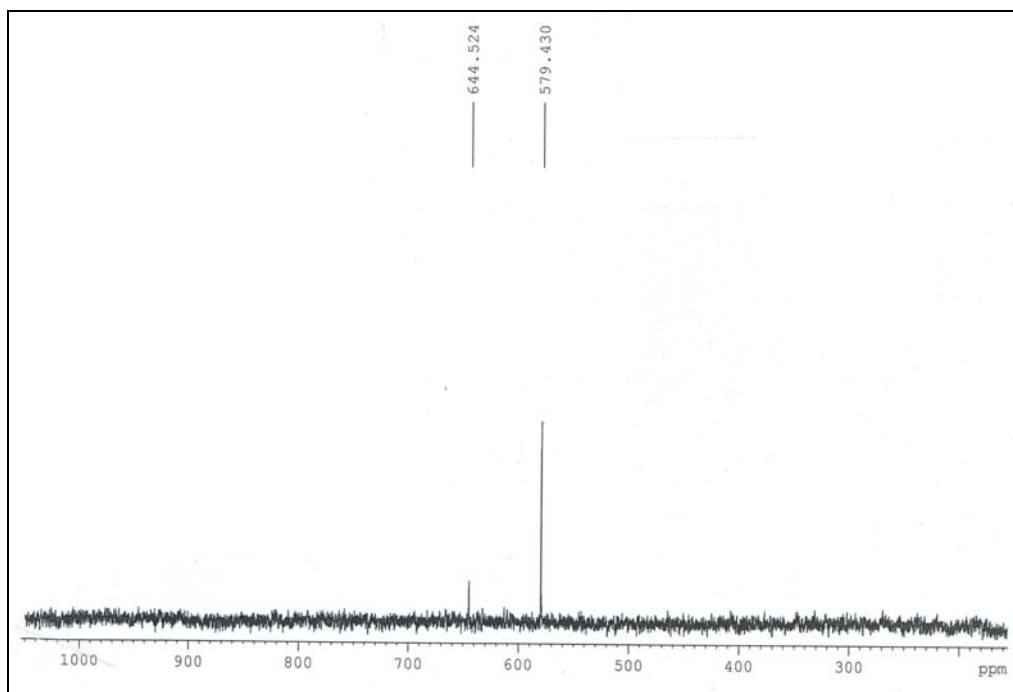

Figure-S24.  $^{77}\text{Se}$  NMR spectrum obtained (in  $\text{CD}_3\text{OD}$ ) after treatment of the spirodiazaselenurane **19** with 2 equiv of PN, indicating the formation of compounds **19** and **36**.

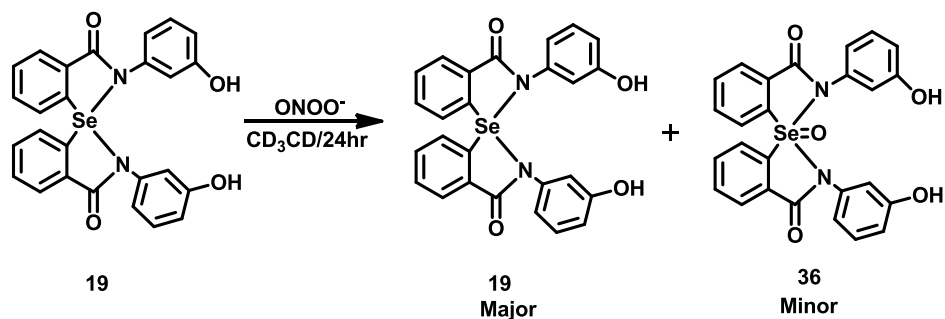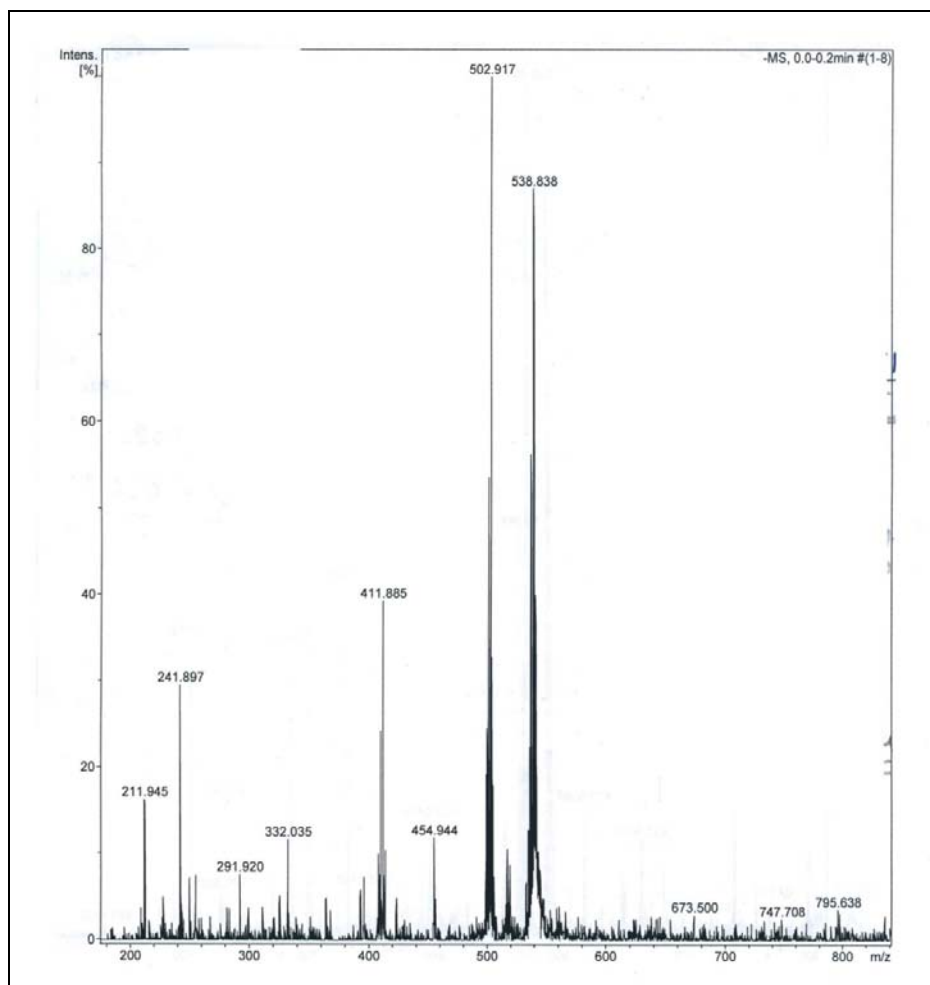

Figure-S25. ESI-Mass spectrum obtained for the reaction of spirodiazaselenurane **19** with 2 equiv of PN, indicating the formation of compounds **19** and **36**. Calculated Mass ( $M^+$ ): 502.04, Observed Mass:502.91 for the compound **19**, for the compound **36**, Calculated Mass ( $M^+$ ):518.04, Observed Mass:538.83( $M+\text{Na}$ )<sup>+</sup>

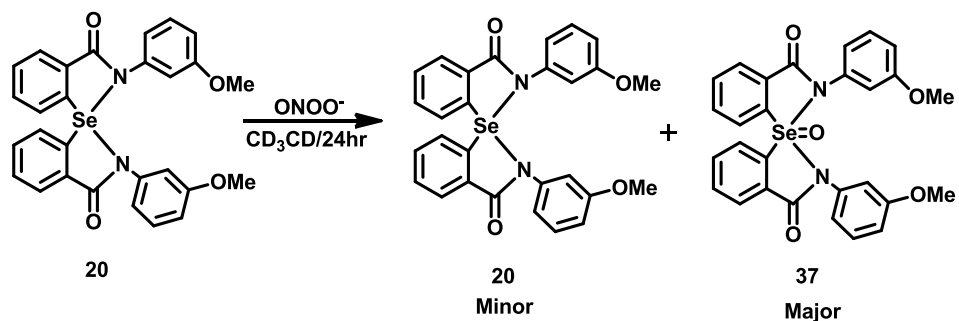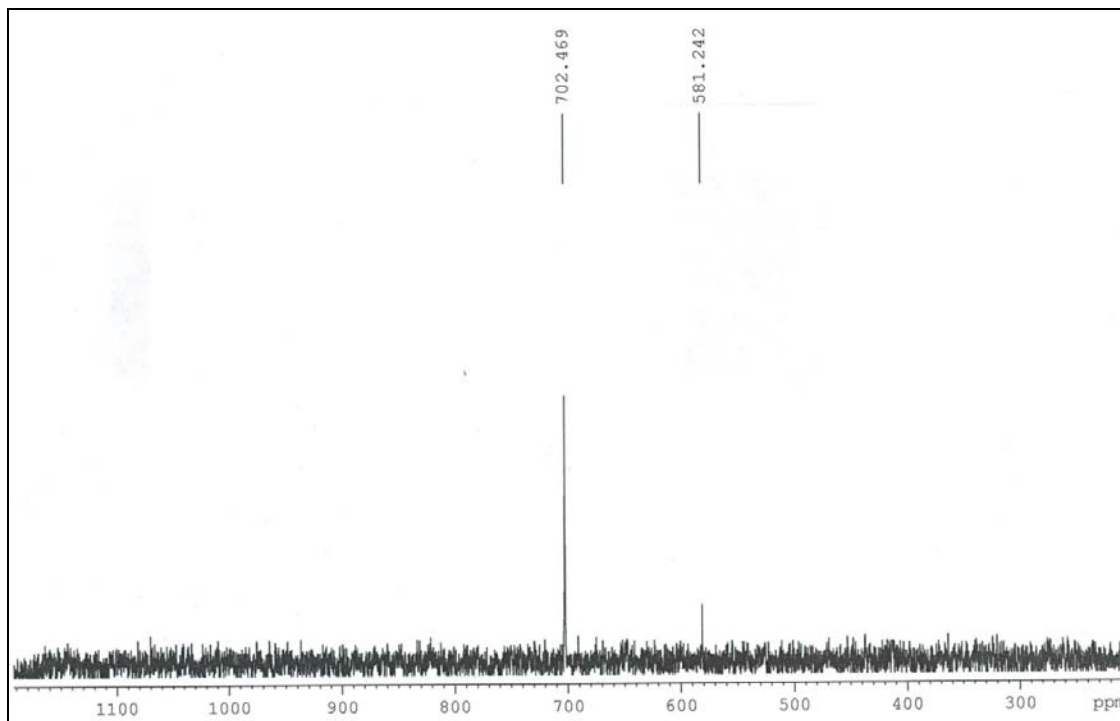

Figure-S26.  $^{77}\text{Se}$  NMR spectrum (in  $\text{CD}_3\text{OD}$ ) obtained after treating the spirodiazaselenurane **20** with 2 equiv of PN, indicating the formation of compounds **20** and **37**.

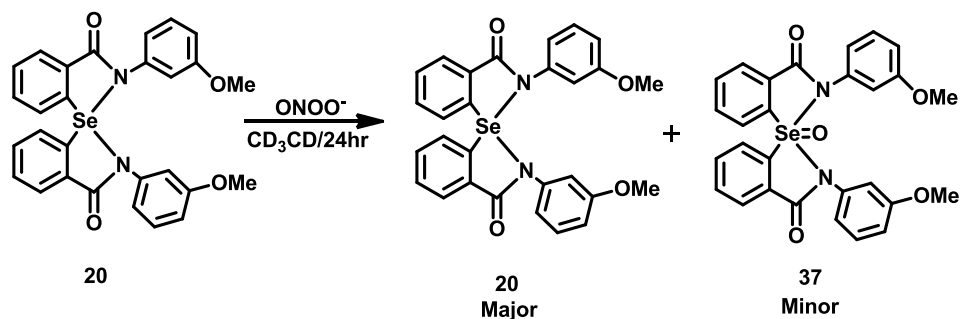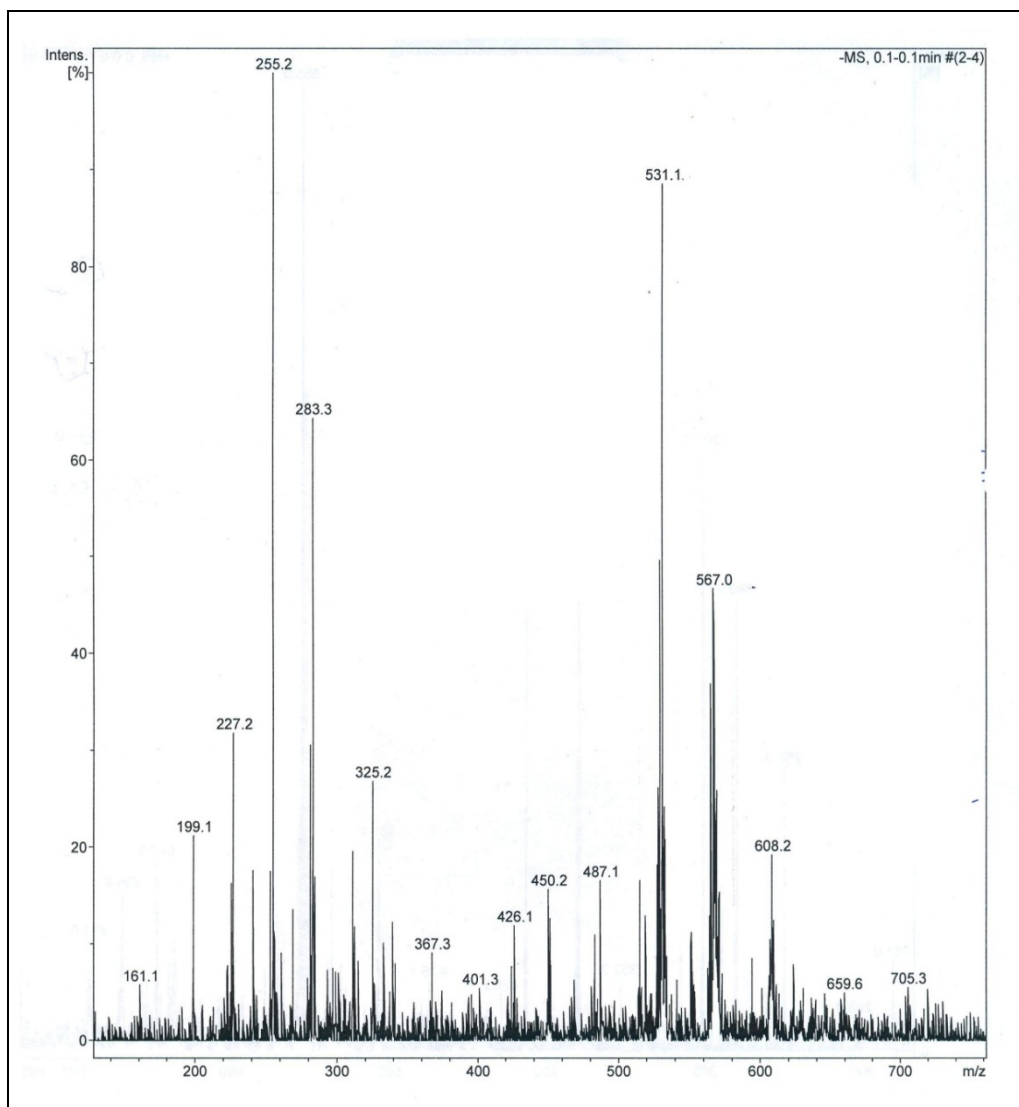

Figure-S27. ESI-Mass spectrum obtained for the reaction of spirodiazaselenurane **20** with 2 equiv of PN, indicating the formation of compounds **20** and **37**. Calculated Mass ( $M$ )<sup>+</sup>: 530.3, Observed Mass:531.1 for the compound **20**, for the compound **37**, Calculated Mass ( $M$ )<sup>+</sup>: 546.0, Observed Mass:567.8 ( $M+Na$ )<sup>+</sup>.



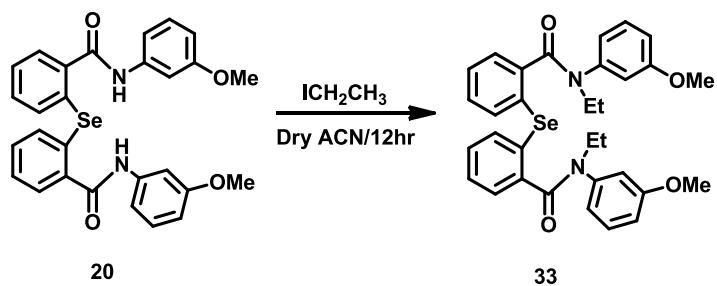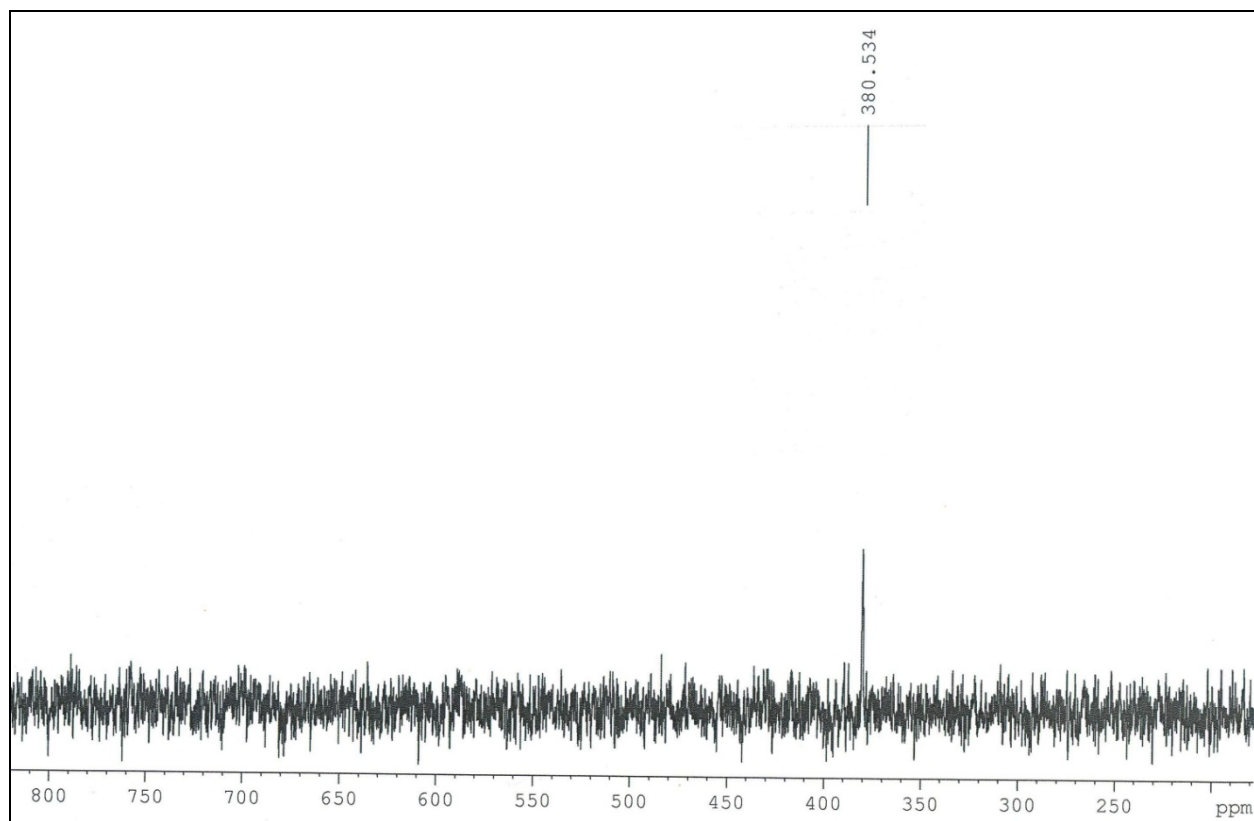

Figure-S28.  $^{77}\text{Se}$  NMR spectrum obtained after treating diaryl selenide **20** with 2 eqv  $\text{ICH}_2\text{CH}_3$  in dry acetonitrile. The spectrum, recorded in  $\text{CDCl}_3$  after 12 h, indicates the formation of compound **33**.

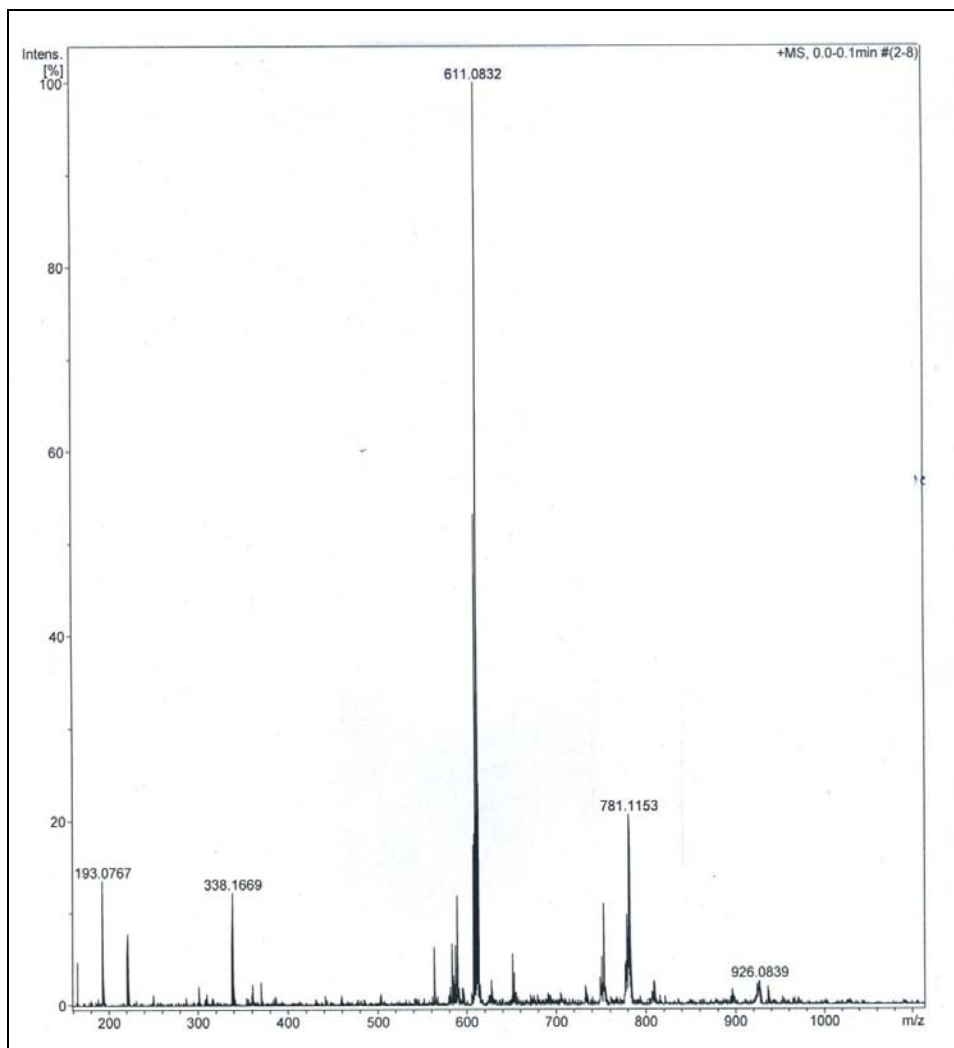

Figure-S29. ESI  $-$ Mass spectrum of compound **33**. Calculated Mass ( $M$ ) $^{+}$ : 588.3, Observed Mass: 611.083 ( $M+Na$ ) $^{+}$

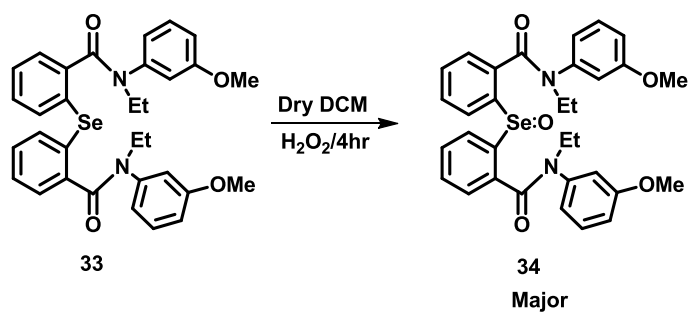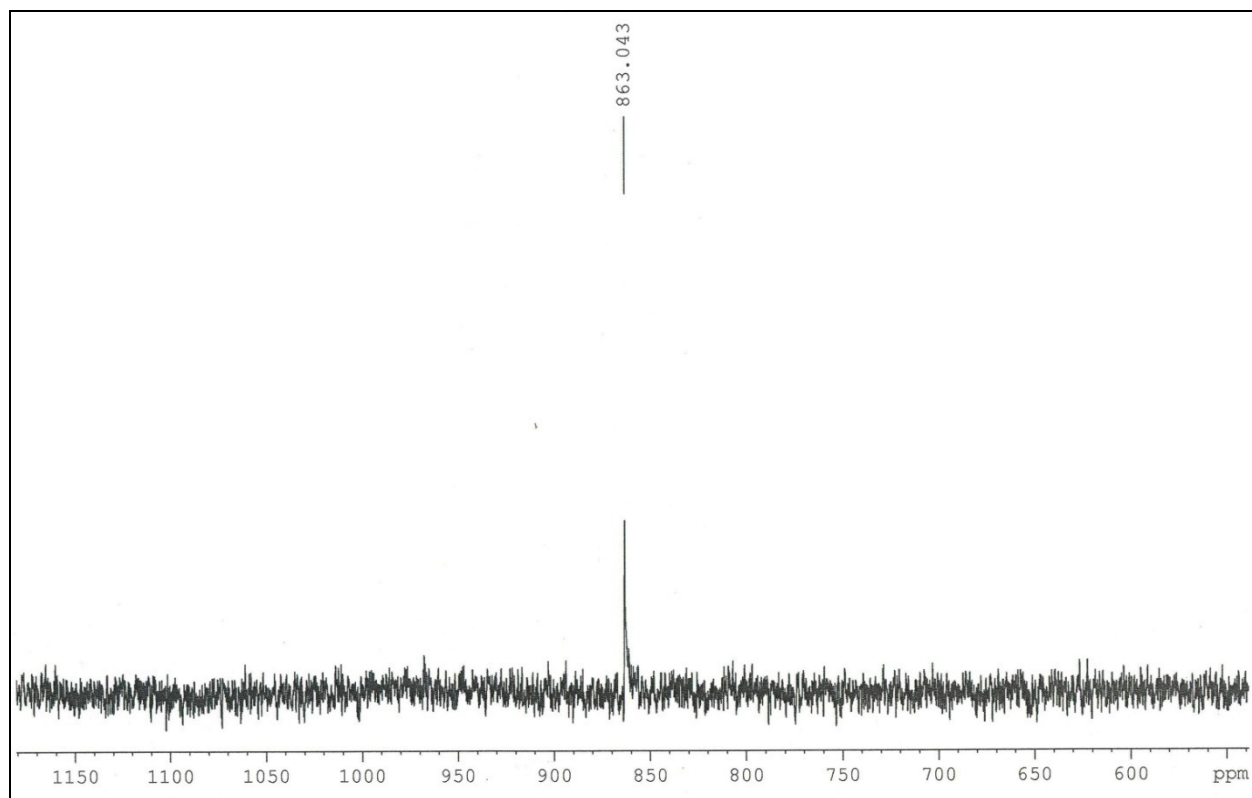

Figure-S30.  $^{77}\text{Se}$  NMR spectrum recorded (in  $\text{CDCl}_3$ ) after addition of  $\text{H}_2\text{O}_2$  to **33**. After 4 h, a complete conversion of **33** to **34** was observed.

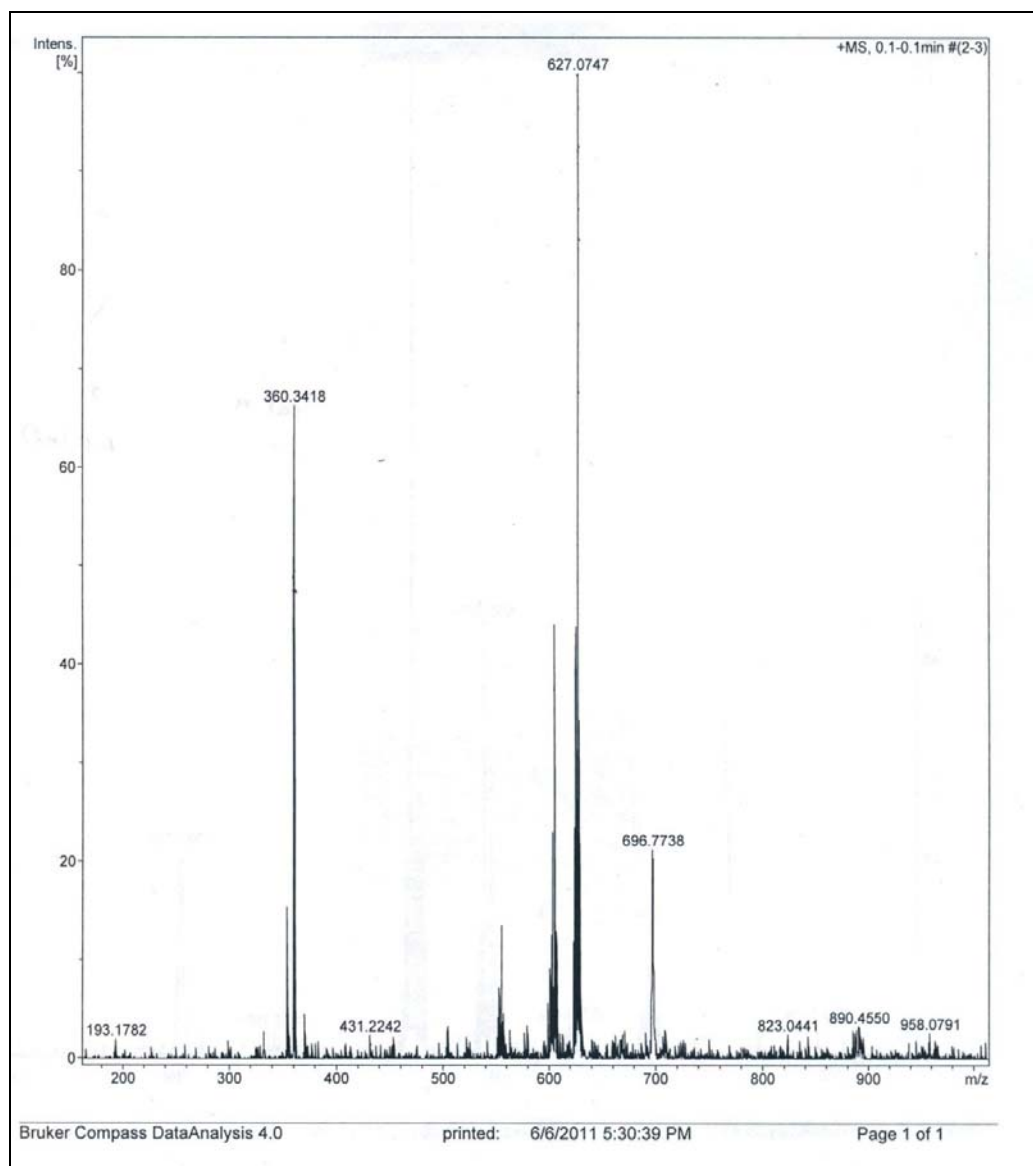

Figure-S31. ESI –Mass spectrum of pure compound **34**. Calculated Mass ( $M$ )<sup>+</sup>: 603.63, observed Mass: 627.074 ( $M+Na$ )<sup>+</sup>

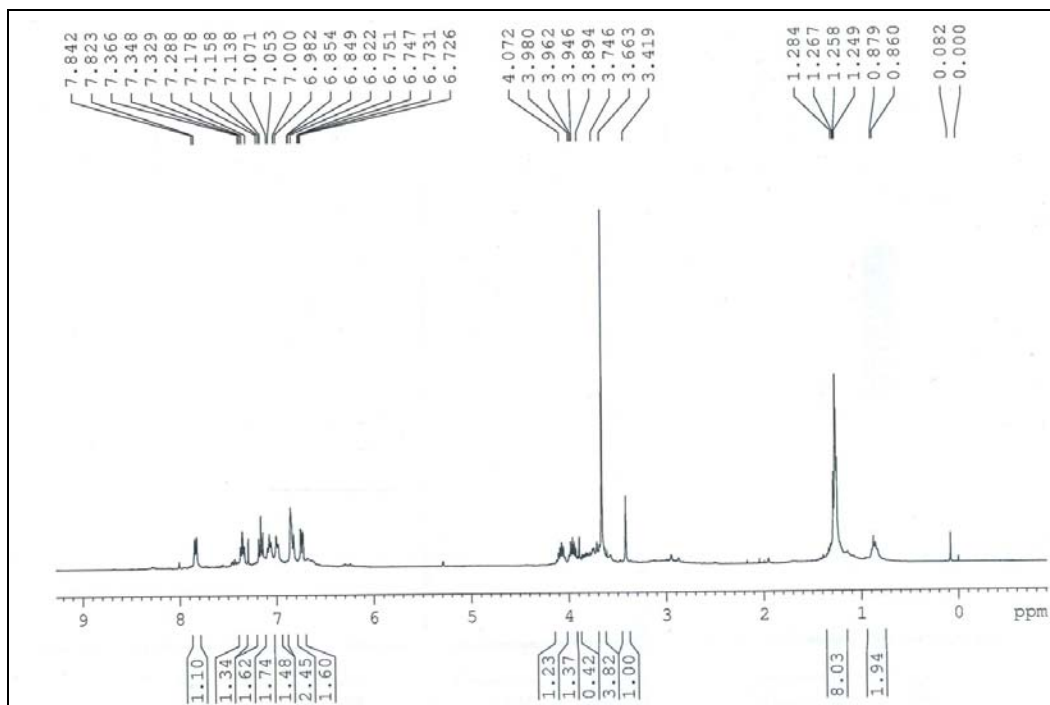

Figure-S32. <sup>1</sup>H NMR spectra of pure compound **34** in CDCl<sub>3</sub>.

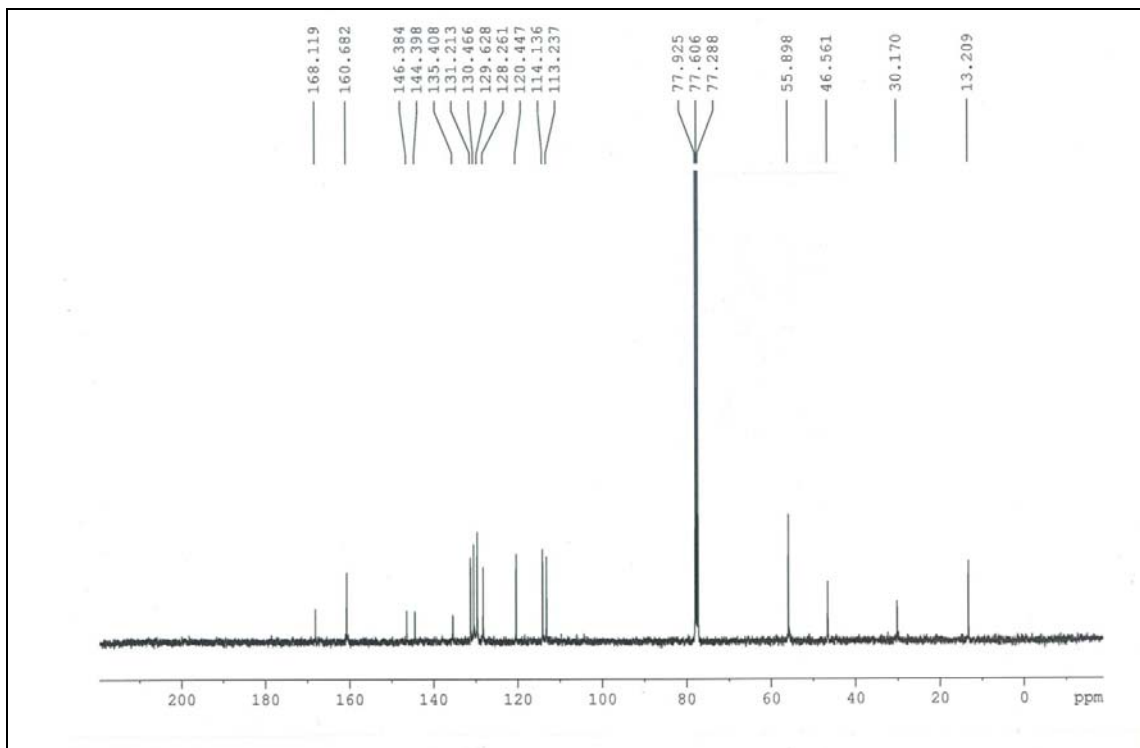

Figure-S33. <sup>13</sup>C NMR spectra of pure compound **34** in CDCl<sub>3</sub>.

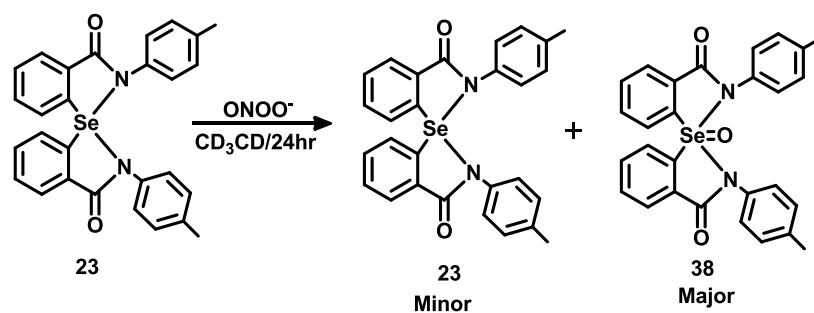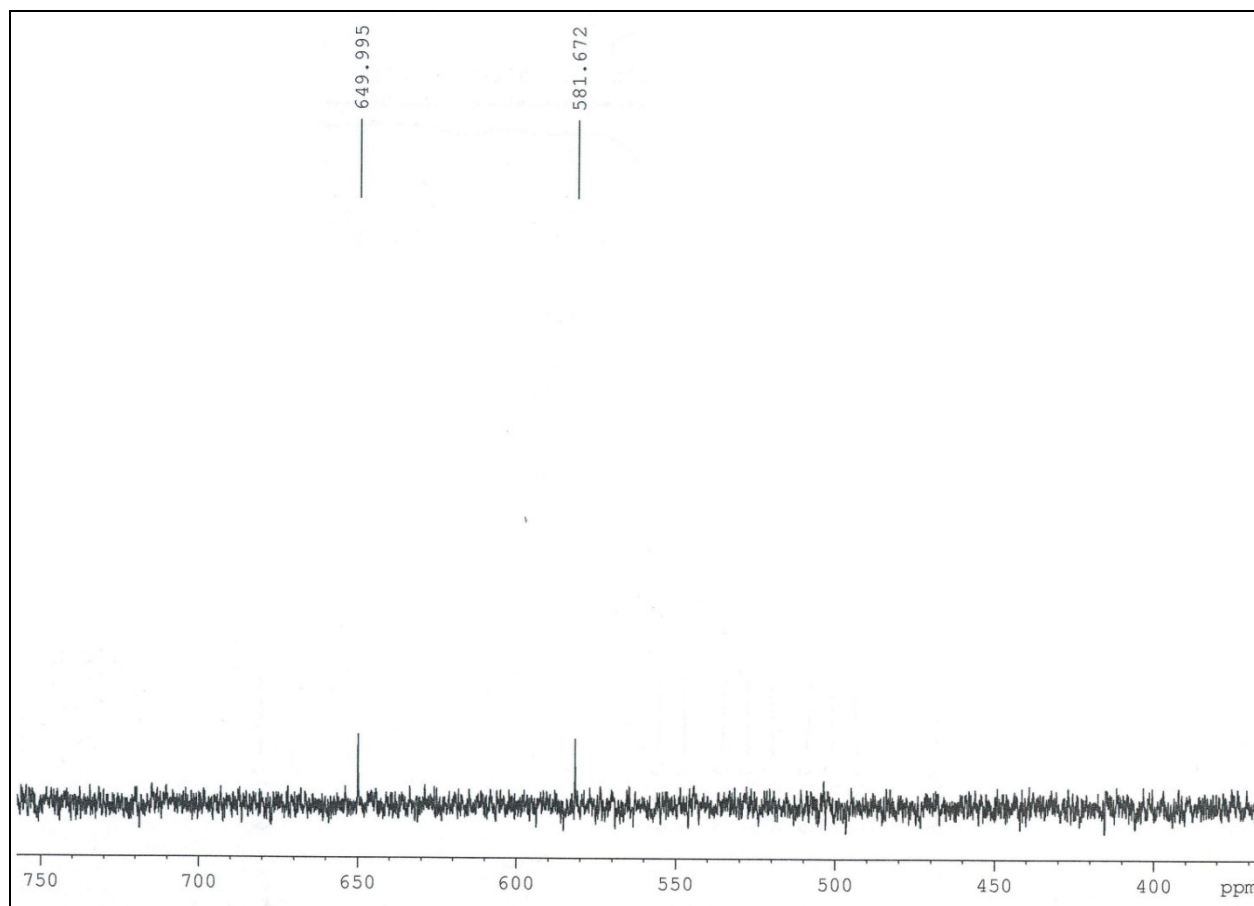

Figure-S34.  $^{77}\text{Se}$  NMR spectrum recorded (in  $\text{CD}_3\text{OD}$ ) after the addition of 2 equiv of PN to the spirodiazaselenurane **23** indicating the formation of **23** and **38** after 24 h.

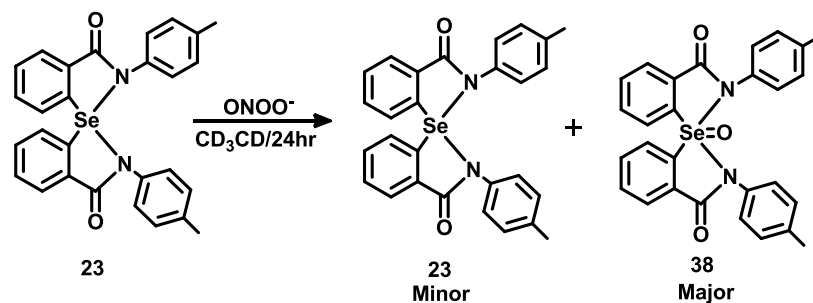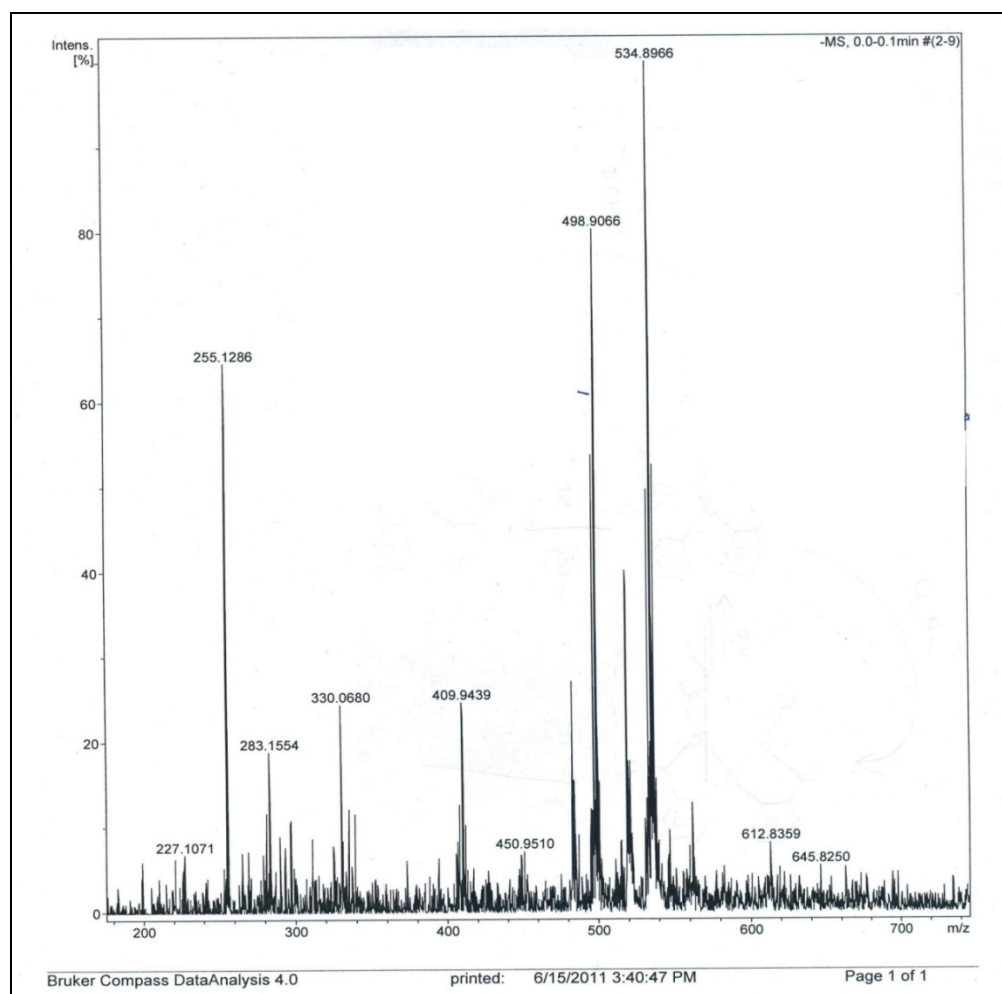

Figure-S35. ESI-Mass spectrum obtained for the reaction of spirodiazaselenurane **23** with 2 equiv of PN, indicating the formation of compounds **23** and **38**. Calculated Mass ( $M^+$ ): 497.47, Observed Mass:498.906 for the compound **23**, for the compound **38**, Calculated Mass ( $M^+$ ): 514.48, Observed Mass:534.895( $M+\text{Na}$ ) $^+$ .
